# Supplementary material
Source: Springer Nature journal article supplement (https://www.springermedizin.de/resource/supplementary/12889_2012_5260_MOESM2_ESM.pdf/9494962)

**Figure 2.**

Mean proportion (%) of First Nations/Native tobacco found at each of the 25 schools sampled

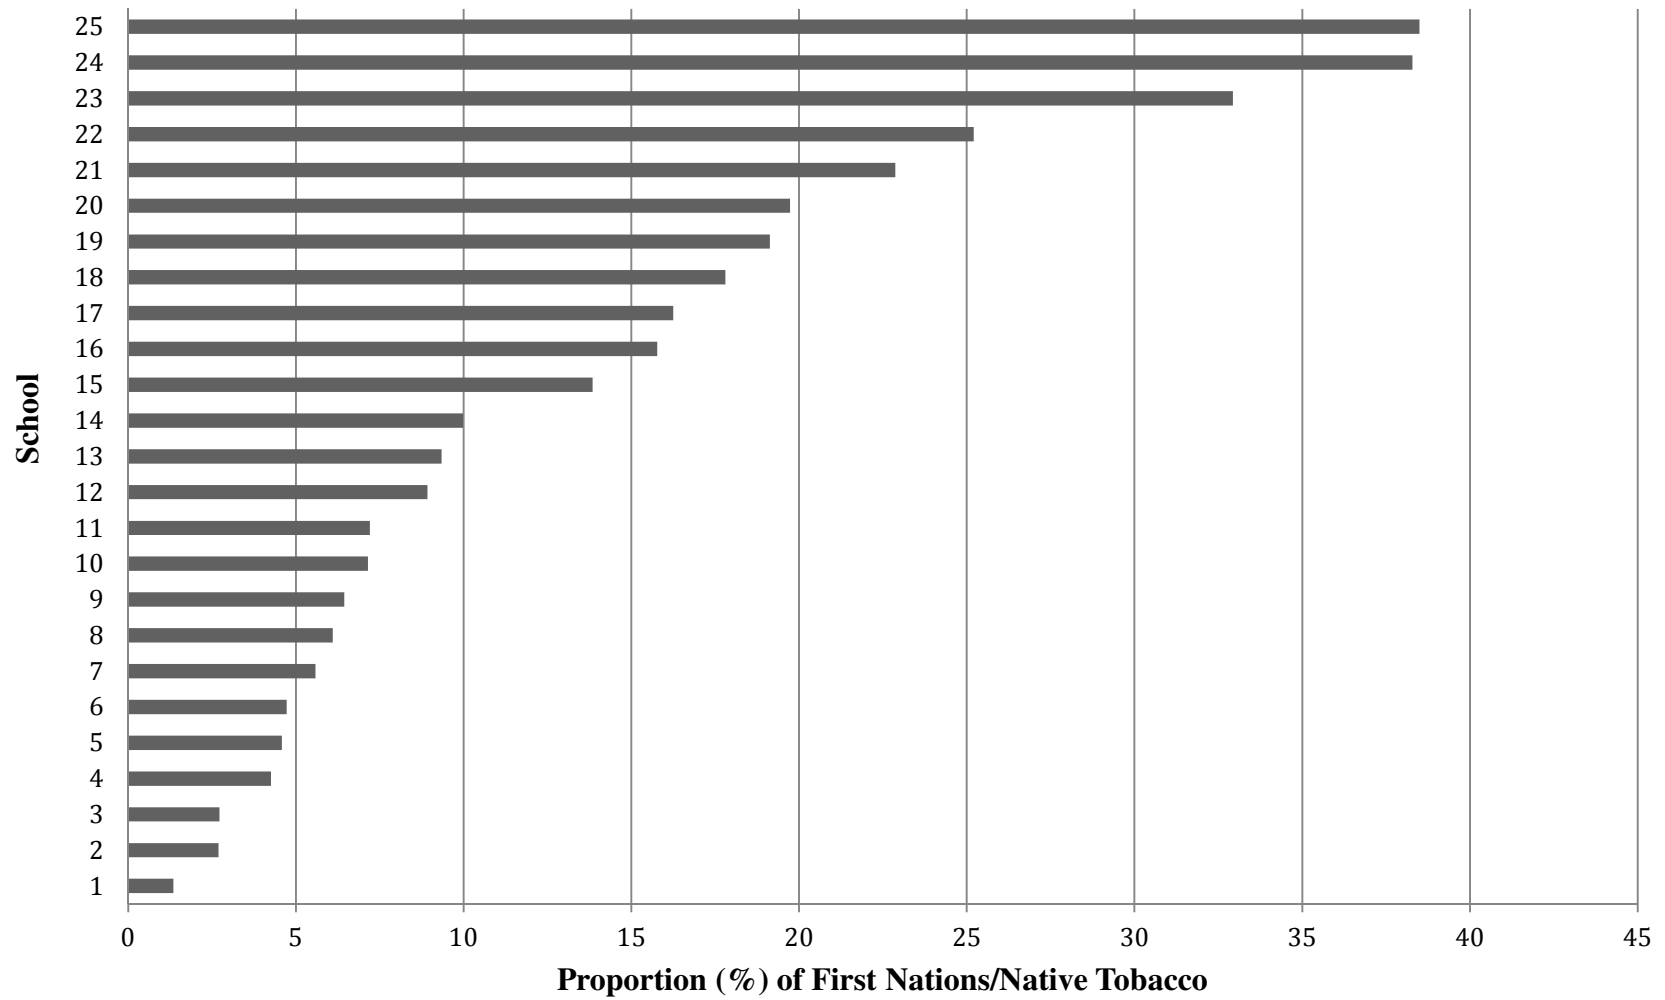

Supplement: MOESM2 [file 9494962]
